# Supplementary figures and images for: Sex-specific associations between birthweight and objectively measured energy intake in adulthood
Source: Research Square preprint supplement (doi:10.21203/rs.3.rs-2518158/v1), 2023-03-09

## Supplemental Figure

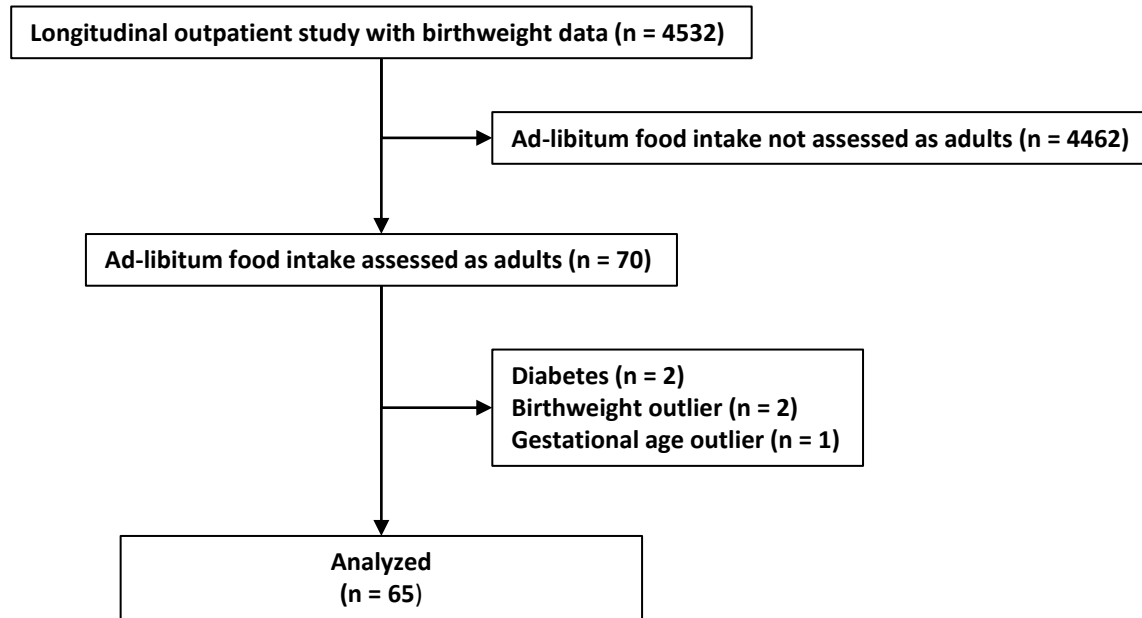

Supplement: Supplementary file 1 [file 87c5053b50328a399a82554a.pdf]
